# Supplementary material for: Urate transport capacity of glucose transporter 9 and urate transporter 1 in cartilage chondrocytes
Source: PubMed Central journal article supplement — Mol Med Rep. 2019 Jun 25;20(2):1645–54. doi: 10.3892/mmr.2019.10426 (PMC6625399; doi:10.3892/mmr.2019.10426), 2019-06-25
Supplement: Supplementary_Data.pdf [file Supplementary_Data.pdf]

Figure S1. Negative control images of immunohistochemical assay. Sections from five cartilage tissue samples (I to V) were incubated with PBS, and then horseradish peroxidase-conjugated goat anti-rabbit immunoglobulin G secondary antibodies. Sections from sample II were imaged at x100 magnification.

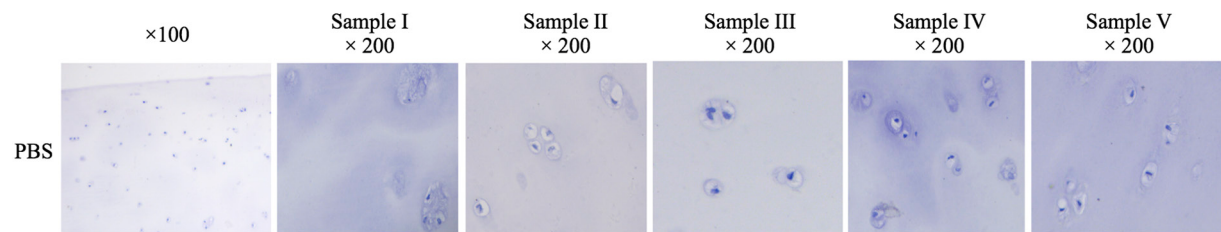

Figure S2. Plasmid map of *SLC2A9* pcDNA3.1-T2A-EGFP. *SLC2A9*, solute carrier family 2 member 9 (encodes glutamate transporter 9); EGFP, enhanced green fluorescent protein; CMV, cytomegalovirus.

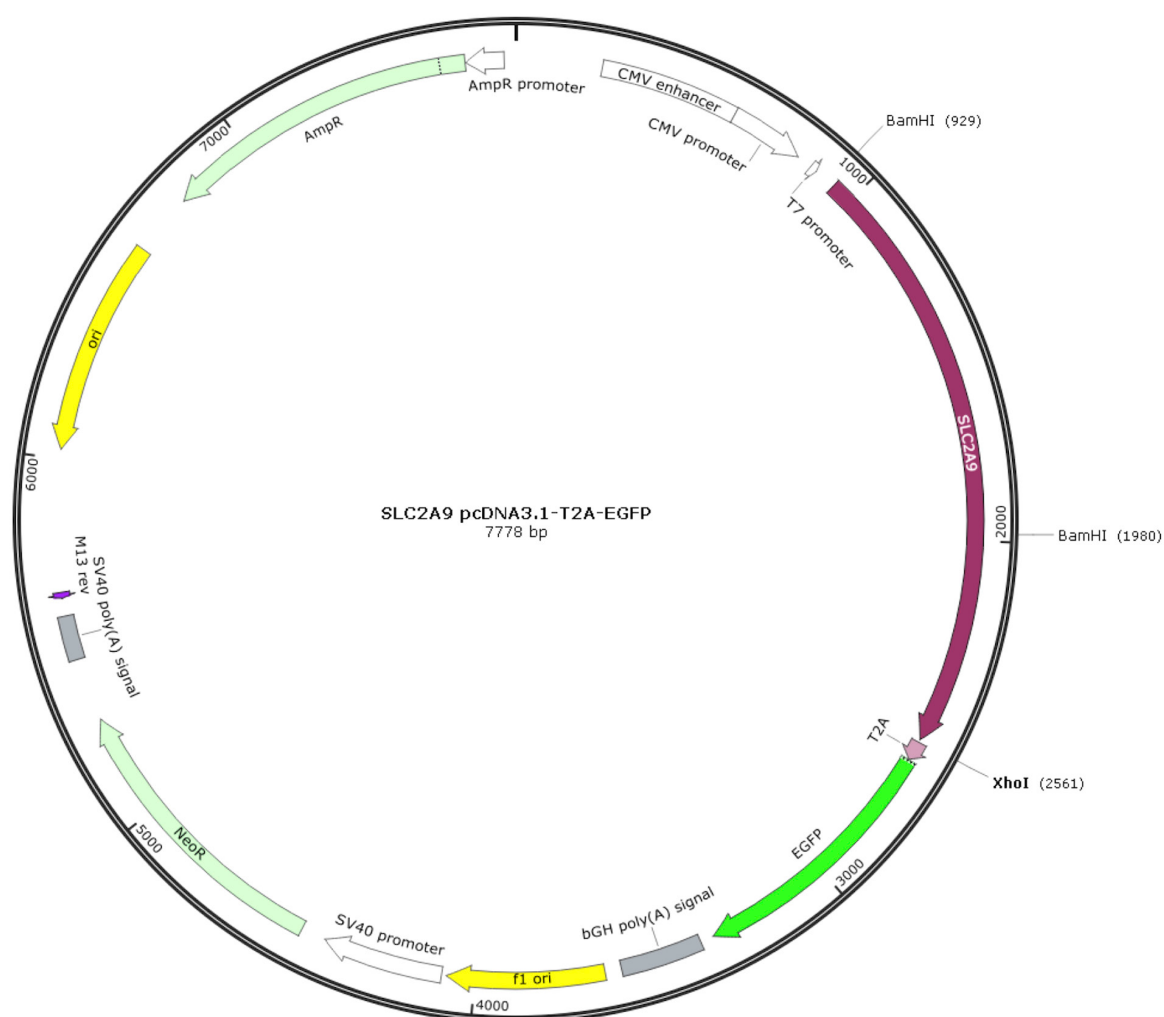

Figure S3. Plasmid map of *SLC22A12* pcDNA3.1-T2A-EGFP. *SLC22A12*, solute carrier family 22 member 12 (encodes urate transporter 1); EGFP, enhanced green fluorescent protein; CMV, cytomegalovirus.

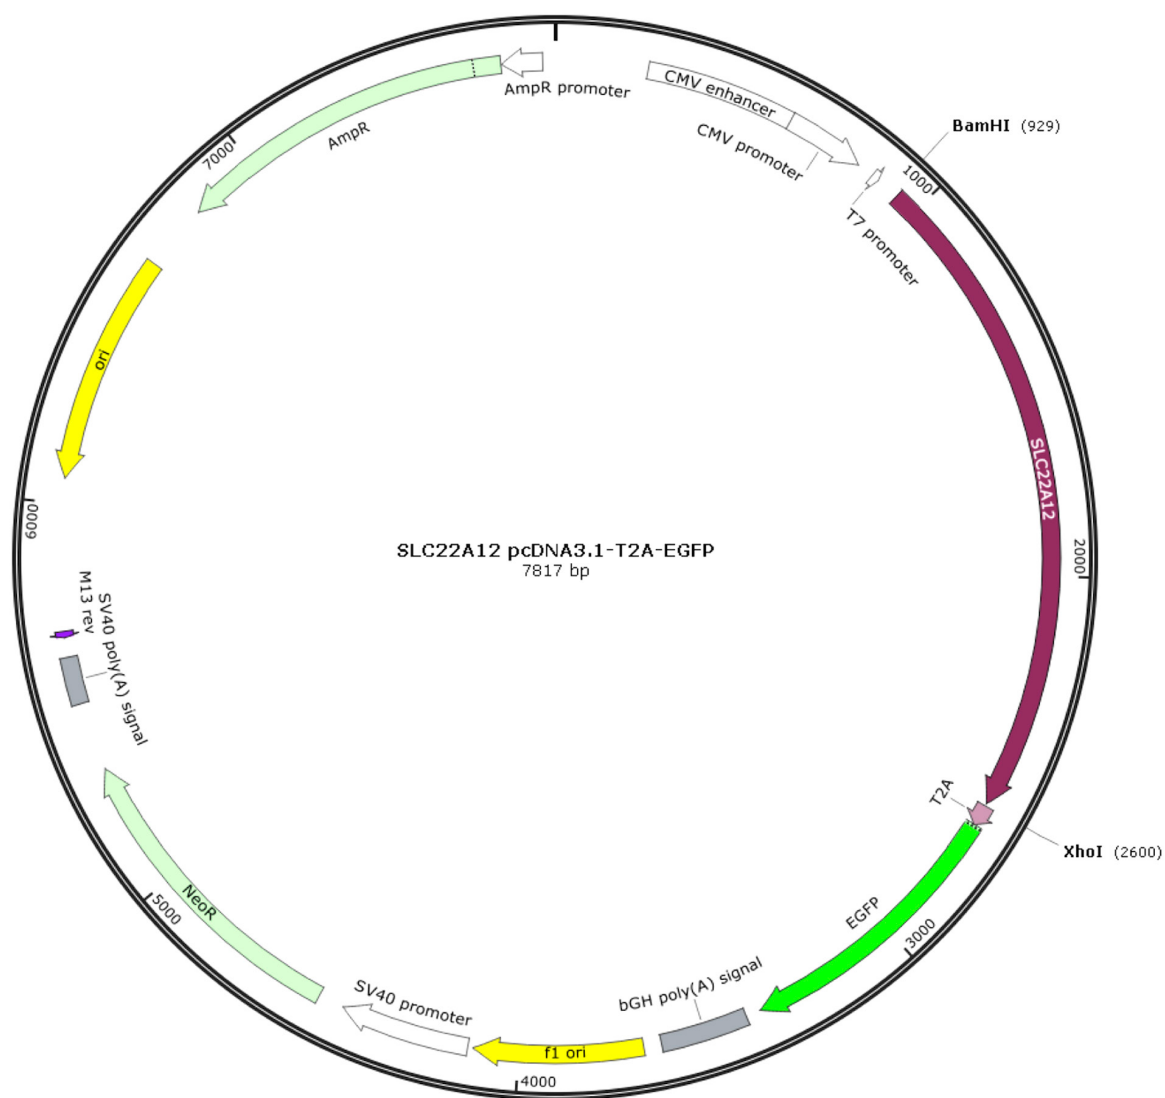

Figure S4. Negative control images of immunofluorescence in HC-a cells. HC-a cells were incubated with PBS and then FITC-conjugated mouse anti-rabbit immunoglobulin G secondary antibodies.

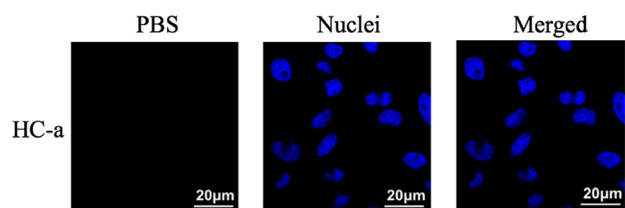

Figure S5. Negative control western blot assay. Proteins from the five cartilage tissue samples (I to V), HC-a cells and 293 cells were separated via 10% SDS-PAGE and transferred onto nitrocellulose membranes, which were incubated with PBS and then horseradish peroxidase-conjugated secondary antibodies.

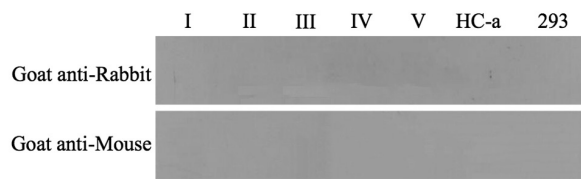

Table SI. Clinical characteristics of the 5 patients from whom cartilage samples were collected.

| NO  | Gender | Age (years) | Location | sUA, $\mu\text{mol/l}$ | Gout | OA | RA | Hypertension | Diabetes |
|-----|--------|-------------|----------|------------------------|------|----|----|--------------|----------|
| I   | M      | 68          | L        | 387                    | N    | N  | N  | Y            | Y        |
| II  | M      | 58          | R        | 356                    | N    | N  | N  | N            | Y        |
| III | F      | 64          | R        | 289                    | N    | N  | N  | Y            | N        |
| IV  | M      | 60          | L        | 304                    | N    | N  | N  | Y            | N        |
| V   | F      | 54          | R        | 258                    | N    | N  | N  | N            | N        |

NO, patient number; Location, location of the fracture, L, left, R, right; SUA, soluble uric acid; OA, osteoarthritis; RA, rheumatoid arthritis.

Table SII. Western blot density of GLUT9, URAT1 and Collagen II in five cartilage samples.

| Samples | GLUT9        | URAT1        | Collagen II  |
|---------|--------------|--------------|--------------|
| I       | 1.256±0.0597 | 1.066±0.0709 | 1.167±0.0678 |
| II      | 1.143±0.0782 | 1.031±0.0427 | 1.281±0.0734 |
| III     | 1.263±0.0861 | 1.159±0.0883 | 1.096±0.0752 |
| IV      | 1.285±0.0795 | 1.045±0.0807 | 1.364±0.0986 |
| V       | 1.163±0.0370 | 1.103±0.0328 | 1.206±0.0652 |

Data are presented as the mean ± standard errors (n=3). GLUT9, glucose transporter 9; URAT1, urate transporter 1.

Table SIII. Western blot density of GLUT9 in HC-a cells.

| Cell samples | Total                     | Membrane                  | Cytoplasmic               |
|--------------|---------------------------|---------------------------|---------------------------|
| HC-a         | 4.595±0.2934              | 4.504±0.3985              | 2.545±0.1891              |
| HC-GLUT9     | 1.566±0.2449 <sup>a</sup> | 1.000±0.1855 <sup>a</sup> | 1.046±0.1152 <sup>a</sup> |
| HC-sc        | 4.504±0.3985              | 4.828±0.1955              | 2.293±0.2319              |
| HC-a + BEN   | 4.336±0.2780              | 4.706±0.2412              | 2.419±0.1410              |

<sup>a</sup>P<0.05 vs. HC-a. Data are presented as the mean ± standard deviation (n=3). GLUT9, glucose transporter 9; HC-sc, HC-a cells transfected with scrambled RNA; HC-shGLUT9, HC-a cells with short hairpin RNA-mediated GLUT9 knockdown; BEN, benzbromarone.

Table SIV. Western blot density of URAT1 in HC-a cells.

| Cell samples | Total                     | Membrane                  | Cytoplasmic               |
|--------------|---------------------------|---------------------------|---------------------------|
| HC-a         | 9.052±0.8584              | 5.136±0.4673              | 3.032±0.1496              |
| HC-URAT1     | 2.373±0.3491 <sup>a</sup> | 1.030±0.1229 <sup>a</sup> | 1.049±0.2168 <sup>a</sup> |
| HC-sc        | 9.100±0.7359              | 5.398±0.4567              | 3.547±0.2817              |
| HC-a + BEN   | 8.636±0.9703              | 5.085±0.6868              | 3.456±0.2963              |

<sup>a</sup>P<0.05 vs. HC-a. Data are presented as the mean ± standard deviation (n=3). URAT1, urate transporter 1; HC-sc, HC-a cells transfected with scrambled RNA; HC-shURAT1, HC-a cells with short hairpin RNA-mediated URAT1 knockdown; BEN, benzbromarone.

Table SV. Intracellular UA concentrations in wildtype chondrocytes following incubation with exogenous sUA.

| sUA concentration (mM) | Intracellular UA (nmol/well) |
|------------------------|------------------------------|
| Control                | 10.43±0.336                  |
| 0.25                   | 16.44±0.511                  |
| 0.50                   | 22.73±0.800                  |
| 0.75                   | 28.42±0.875                  |
| 1.00                   | 34.69±1.273                  |

Data are presented as the mean ± standard deviation (n=3). (s)UA, (soluble) uric acid; Control, incubated in buffer without UA.

Table SVI. Intracellular UA concentrations in wildtype and shRNA-mediated knockdown chondrocytes following incubation with exogenous sUA (1 mM) with or without pretreatment with BEN (50  $\mu$ M).

| Incubation | Intracellular UA (nmol/well)   |                                |                                  |                                  |
|------------|--------------------------------|--------------------------------|----------------------------------|----------------------------------|
|            | HC-a                           | HC-sc                          | HC-shGLUT9                       | HC-shURAT1                       |
| Control    | 10.43 $\pm$ 0.336              | 10.37 $\pm$ 0.503              | 10.49 $\pm$ 0.449                | 9.96 $\pm$ 0.314                 |
| sUA        | 34.69 $\pm$ 1.273 <sup>a</sup> | 33.88 $\pm$ 1.425 <sup>a</sup> | 25.28 $\pm$ 0.999 <sup>a,b</sup> | 19.35 $\pm$ 0.594 <sup>a,b</sup> |
| BEN        | 9.56 $\pm$ 0.384               | 9.68 $\pm$ 0.671               | 9.65 $\pm$ 0.299                 | 9.5 $\pm$ 0.286                  |
| BEN + sUA  | 14.41 $\pm$ 0.565 <sup>c</sup> | 13.36 $\pm$ 0.520 <sup>c</sup> | 13.45 $\pm$ 0.404 <sup>c</sup>   | 11.65 $\pm$ 0.456 <sup>c</sup>   |

<sup>a</sup>P<0.05 vs. Control; <sup>b</sup>P<0.05 vs. HC-a cells under the same incubation conditions; <sup>c</sup>P<0.05 vs. sUA. Data are presented as the mean  $\pm$  standard deviation (n=3). GLUT9, glucose transporter 9; URAT1, urate transporter 1; (s)UA, (soluble) UA; shRNA, short hairpin RNA; BEN, benzbromarone; Control, incubated in buffer without UA; HC-sc, HC-a cells transduced with scrambled RNA; HC-shGLUT9, HC-a cells with GLUT9 knockdown; HC-shURAT1, HC-a cells with URAT1 knockdown.

Table SVII. Western blot densities in wildtype and transduced 293 cells.

|           | GLUT9 density             | URAT1 density             |
|-----------|---------------------------|---------------------------|
| 293       | 1.135±0.0711              | 1.106±0.0847              |
| ec-293    | 1.020±0.1414              | 0.992±0.1361              |
| GLUT9-293 | 3.373±0.3491 <sup>a</sup> |                           |
| URAT1-293 |                           | 8.309±0.5617 <sup>a</sup> |

<sup>a</sup>P<0.05 vs. 293. Data are presented as the mean ± standard deviation (n=3). GLUT9, glucose transporter 9; URAT1, urate transporter 1; ec-293, 293 cells transduced with empty vector; GLUT9-293, 293 cells overexpressing GLUT9; URAT1-293, 293 cells overexpressing URAT1.

Table SVIII. Intracellular UA concentrations in wildtype and transduced 293 cells following exogenous sUA incubation.

| sUA concentration (mM) | Intracellular UA (nmol/well) |                          |                          |
|------------------------|------------------------------|--------------------------|--------------------------|
|                        | 293                          | GLUT9-293                | 293-URAT1                |
| Control                | 0.85±0.415                   | 0.87±0.223               | 0.65±0.159               |
| 0.25                   | 2.22±0.415                   | 3.01±0.712               | 4.98±2.257 <sup>a</sup>  |
| 0.50                   | 3.50±0.194                   | 6.40±1.050 <sup>a</sup>  | 10.01±0.292 <sup>a</sup> |
| 0.75                   | 4.78±0.177                   | 9.05±0.283 <sup>a</sup>  | 11.79±0.337 <sup>a</sup> |
| 1.00                   | 7.39±0.450                   | 12.62±1.776 <sup>a</sup> | 15.66±1.080 <sup>a</sup> |

<sup>a</sup>P<0.05 vs. 293. Data are presented as the mean ± standard deviation (n=3). GLUT9, glucose transporter 9; URAT1, urate transporter 1; (s)UA, (soluble) uric acid; Control, incubated in buffer without UA; GLUT9-293, 293 cells overexpressing GLUT9; URAT1-293, 293 cells overexpressing URAT1.

Table SIX. Intracellular UA concentrations in wildtype and transduced 293 cells following incubation with exogenous sUA with or without BEN pretreatment.

| Incubation | Intracellular UA (nmol/well) |                         |                            |                            |
|------------|------------------------------|-------------------------|----------------------------|----------------------------|
|            | 293                          | ec-293                  | GLUT9-293                  | URAT1-293                  |
| Control    | 0.85±0.415                   | 0.74±0.196              | 0.87±0.223                 | 0.65±0.159                 |
| sUA        | 7.39±0.450 <sup>a</sup>      | 7.28±0.283 <sup>a</sup> | 12.62±1.776 <sup>a,b</sup> | 15.66±1.080 <sup>a,b</sup> |
| BEN + sUA  | 1.19±0.065 <sup>c</sup>      | 1.08±0.106 <sup>c</sup> | 2.91±0.135 <sup>c</sup>    | 1.34±0.287 <sup>c</sup>    |

<sup>a</sup>P<0.05 vs. Control; <sup>b</sup>P<0.05 vs. 293 cells under the same incubation conditions; <sup>c</sup>P<0.05 vs. sUA. Data are presented as the mean ± standard deviation (n=3). GLUT9, glucose transporter 9; URAT1, urate transporter 1; (s)UA, (soluble) uric acid; Control, incubated in buffer without UA; ec-293 cells, 293 cells transduced with empty vector; GLUT9-293, 293 cells overexpressing GLUT9; URAT1-293, 293 cells overexpressing URAT1; BEN, benzbromarone.
